# Supplementary material
Source: Research Square preprint supplement (doi:10.21203/rs.3.rs-9471788/v1)
Supplement: Supplementary file 2 [file dec77ce1e8b42962da882588.docx]

**Table. S1 The top 15 genes with level of gene expression in five tissues**

**Renal cortex Renal medulla Pancreas Liver Muscle**

Symbol FPKM Symbol FPKM Symbol FPKM Symbol FPKM Symbol FPKM

| *GPX3* 21081.2 *EEF1A1* 10388.4 *LOC105-* 140826.7 *HP* 32994.7 *CRYAB* 13638.6  *078642*  *FTL* 9794.5 *SPP1*  7968.9 *CTRC* 107422.6 *FGB* 27006.9  *ACTA1*  12839.1  *EEF1A1* 9137.1 *CLU* 4527.8 *LOC105-* 89797.7 *ALB* 26214.5 *ANKRD1* 7659.5  *064664*  *RBP4*  6508.9 *UMOD* 4317.4 *CELA3B* 69164.5 *FGA* 21620.2 *GAPDH* 7075.3  *FTH1* 6506.9 *RPLP1* 3315.0 *LOC105-* 55433.1 *FGG* 21363.1 *MYLPF* 7016.9  *070667*  *LOC105-* 6267.2 *TPT1* 2803.0 *CPA1* 48819.8 *LOC105-* 8968.4 *HSPB1* 6395.1  *081748* *076583*  *ALDOB* 3640.8 *TMSB4X* 2748.5 *PLA2G1B* 37609.4 *LOC105-* 5872.1 *CKM* 6379.6  *070733*  *ECHS1* 3566.5 *LOC105* 2574.6 *LOC105-* 36976.5 *APOC3* 5829.8 *HSPA6* 5955.0  *078297* *080756*  *FGG* 3281.5 *IGFBP7* 2565.5 *LOC105-* 31167.8 *LOC105-* 5498.7 *TNNC2* 5828.0  *064181* *077600*  *FGB* 2994.6 *LOC105-* 2310.7 *CELA1* 28273.9 *APOC2* 3876.8 *ALDOA* 4920.6  *067830*  *PDZK1IP1* 2994.5 *RPL7* 2092.6 *LOC105-* 27267.2 *FTL* 3772.1 *LOC105-* 4902.2  *082500*  *061741*  *TPT1* 2727.0 *CXCL14* 2043.3 *CEL* 22707.7 *EEF1A1* 3617.6 *LOC105*- 4500.4  *061742*  *LOC105-* 2637.6 *S100A6* 1965.9 *LOC105-* 20741.1 *C3* 3385.3 *MB* 4038.3  *078699* *065368*  *ACSM1* 2555.2 *DEFB1* 1931.0 *CPB1* 15837.7 *SEPP1* 3209.9 *FLNC*  3893.1  *CLU* 2472.0 *LOC105-* 1918.3 *SPINK1* 12159.2 *SERP-* 3167.1 *KLHL41* 3804.4  *072158* *INA1* |
| --- |

According to the size of FPKM value, top 15 genes highly expressed in every tissue was obtained.The genes already reported in the tissues are highlighted.

**Table.** **S2 Gene expression levels of selected genes in five tissues**

| Gene  ID | Renal  cortex | Renal  medulla | Pancreas | Liver | Muscle |
| --- | --- | --- | --- | --- | --- |
| GCK   | G6PC1 | | --- | | KHK | | SLC2A2 | | SORD | | ALDOA | | ALDOB | | TPI1 | | FBP1 | | SLC37A4 | | HK1 | | AKR1B1 | | ATP1B1 | | PFKM | | PFKP | | SLC5A2 | | ATP1A1 | | SLC12A3 | | PFKL | | HK2 | | GPI | | SLC12A1 | | SLC12A2 | | CAT | | GPX1 | | GPX3 | | GPX4 | | GSR | | SOD1 | | SOD2 | | SOD3 | | IDH1 | | CLPX | | HSP90AA1 | | HSP90B1 | | TRAP1 | | HSPA2 | | HSPA8 | | HSPA9 | | CCT6A | | HSPD1 | | SERPINH1 | | DNAJA3 | | DNAJB1 | | DNAJB11 | | DNAJC6 | | DNAJC8 | | DNAJC13 | | DNAJC19 | | DNAJC22 | | GRPEL1 | | CRYAB | | HSPB1 | | HSPB8 | | PFDN2 | | PFDN4 | | PFDN6 | | HSPA4L | | HSPH1 | | HYOU1 | | HSP90AB1 | | HSPA1L | | DNAJB5 | | SEC63 | | HSPA4 | | HSPA5 | | HSPA13 | | CCT2 | | CCT3 | | CCT5 | | DNAJA1 | | DNAJA2 | | DNAJC21 | | DNAJC10 | | DNAJC11 | | DNAJC16 | | GRPEL2 | | HSPA6 | | TCP1 | | CCT4 | | DNAJA4 | | DNAJB4 | | DNAJC2 | | DNAJC7 | | HSPB2 | | HSPB3 | | HSPB6 | | HSPB7 | | BAG1 | | BAG2 | | SLC2A1 | | SLC2A3 | | SLC2A4 | | SLC2A6  SLC2A9 | | SLC2A13 | | SLC5A1 | | SLC45A3 | | SLC2A2 | | SLC2A5 | | SLC2A11 | | SLC5A2 | | SLC5A9 | | SLC5A10 | | 0.0  445.4070356  159.418285  20.62082367  202.6051279  434.6154049  3640.822095  401.2477812  1106.320828  426.6817525  17.49016982  18.29418158  1138.245666  21.05378758  23.1318219  286.9957202  1244.904787  59.68084621  42.8124813  0.055997561  149.7611187  76.46437599  1.386271372  819.3987942  1058.946694  21081.23093  724.2434471  75.29894694  546.4588709  165.0221436  473.593987  286.0798947  50.71733194  627.9281035  331.2171683  83.36842141  6.50789177  503.4183808  496.6574381  121.6115423  888.7066772  45.4706351  75.459176  55.33398855  37.14129089  5.656850442  69.86874029  15.05401955  174.9393367  9.165034489  148.896596  114.5843313  659.9135418  17.37095885  53.9176515  28.89649135  69.22143319  0.977490169  17.10686499  20.25727617  296.6701534  2.925032594  2.600046615  62.69075504  31.55139003  221.1878487  14.81241727  74.36645562  94.87532179  86.01849547  83.61537923  61.71706021  20.86260887  15.72039519  29.0687861  3.70866547  6.445958214  2.543337779  99.94673826  82.87431881  2.155758474  10.60828691  28.7180377  47.05083789  14.92181217  0  22.82321808  0.329148454  15.56410849  2.777118  8.448911529  2.314325067  1.703303019  0.695280541  0.467108367  1.791794344  3.783694842  9.582785403  20.62082367  54.33757091  32.09623078  286.9957202  22.61300411  94.39372329 | 0.0  1.690548703  7.719710346  0.279466548  2.964668186  436.0428204  36.04145514  250.5908437  44.98356342  36.92100808  106.1680852  899.4082196  778.0275019  27.07339092  57.04967469  3.186841224  1370.065996  0.054348898  82.14757703  2.066145118  150.8918921  649.0569373  26.69298466  93.70255117  476.564055  366.4757093  406.5531342  81.47991931  381.1390185  240.4241394  34.32462286  27.2570977  37.23748554  652.0832407  293.836472  43.40104804  80.72694455  452.9291881  175.4064433  104.7041936  313.7263316  55.38100408  37.06013837  37.82012165  21.17016951  3.763928652  110.7340096  11.92118708  42.28681823  5.324088161  67.31683661  1318.890041  507.4555483  27.13732567  56.75910509  31.02685166  58.9579655  2.395221551  55.50511312  29.6460768  438.2442835  8.252336649  4.383077417  76.50670354  44.38493324  147.0452315  33.30516155  79.41195014  95.32752454  72.63168569  103.3517374  83.91821899  23.03474936  33.10828669  25.09023969  10.19340499  11.84606357  0.509403497  83.6434297  85.89166716  6.662420296  30.97578326  24.31565878  44.39753412  46.79059251  0.121073014  31.52614753  0.479787014  17.65248286  3.43365444  74.04255325  8.452497794  3.510889746  3.012810473  0  17.59067203  3.554812936  36.35520802  0.279466548  0.96405802  11.39754751  3.186841224  0.241578942  2.564378871 | 0.0  0.11797643  2.846547652  0.715103373  0.31175504  169.9088433  0.839849183  28.29772892  11.1552718  84.0926834  1.255011675  4.367561015  18.82712757  2.136982797  0.831246077  4.192936795  73.436477  0  9.59172018  0.097905267  15.21746512  0  1.845166283  25.66045118  30.31162993  10.05967408  26.83335565  2.195125156  20.61465559  21.7770282  24.80323824  13.94917755  9.639045758  66.56235956  45.4431484  10.03984604  0.812308872  82.2599969  37.19238437  18.22367047  79.6550292  3.294873276  9.018678161  6.785490065  7.177797578  0.590468633  12.03391114  2.706850228  11.78359823  0.473033334  11.01988988  10.22223072  11.446924  0.759277878  8.287365791  4.021152897  12.74253933  0.251443296  3.956663732  15.90715538  266.235708  0.765462541  0.444177704  39.28109478  8.645444324  49.00997645  10.74689483  22.11912051  22.68046519  19.76538514  19.40332414  17.30632616  7.37807206  7.618525324  6.018871649  1.626124941  2.391343344  0.380178643  27.96695679  40.83858474  1.971526453  4.289499537  7.934446907  14.75621857  8.748428992  0  10.7106657  0.153460814  5.756557614  1.849702876  1.385506651  0.479565044  0.347436669  0.212180547  0  1.754337451  0.44102356  0.189077794  0.715103373  0.029367223  2.170932313  4.192936795  0  8.678473631 | 0.0  85.55510193  45.42173801  227.5177145  214.9836078  56.0855221  1019.997409  205.6701682  120.0294282  185.8826089  1.80819992  2.983962091  30.00906647  2.906919566  4.962353505  0  113.9688598  0.167242666  13.01314065  0.075353491  57.37142552  0.010315268  1.273718029  949.0975871  87.57188563  639.3669624  157.1181078  32.26703316  310.645271  483.9212606  44.27200546  94.92670619  140.4185363  339.1628793  482.2372664  55.31019873  0.306470267  412.1653447  438.6318262  95.58980727  599.0568462  8.802056321  59.96312653  37.80041711  40.314193  0.336635864  36.18846776  9.342785995  47.90972598  5.552120818  108.2069135  4.917258217  130.8574879  0.376307661  30.96196464  9.059883625  45.75321043  0.4132568  21.87738745  44.61880169  249.8126335  0.694106121  2.581789597  82.95873582  34.60808229  375.5178841  36.8803212  79.48042941  74.90193487  77.6384394  134.80499  56.64434057  24.19247801  27.00287208  24.0067988  8.698333082  18.55023106  0.330924829  80.69392557  81.12732377  0.334720471  9.655166606  23.72747779  26.68264737  1.643243657  0  13.00200716  0.098426846  52.62670209  1.216023337  2.561367213  1.876261759  0.366093084  0.204132849  0.026190312  1.012678795  1.255209532  0.229067255  227.5177145  0  0.788147932  0  8.52417981  0.576984961 | 0.0  1.265177051  1.710248608  2.972385775  2.25475355  4920.633194  18.7012605  626.2952109  3.986246814  11.61045922  13.3498546  42.16098274  81.72767811  404.3529311  11.26642217  0.043270226  56.19415002  0.013006145  6.780688726  24.33405797  186.5624508  0.072197896  9.184002907  59.63086712  56.79709653  220.5913401  86.86075916  1.508289035  101.2072467  165.1095185  4.632158371  9.052120054  24.96890626  3051.003703  141.4105115  19.84924608  6.059695909  2758.42456  220.3017247  165.1765094  510.8725565  111.8600948  31.3998972  1668.139001  13.08458866  2.866658918  49.63516916  7.302490625  55.81106613  0.070783266  38.91795516  13638.6415  6395.199066  3065.153811  40.92317275  19.90281649  37.45411069  4.009436236  390.0180561  8.664991667  955.8488337  25.25837127  460.8336762  33.76830549  286.7248095  291.3559256  27.43772579  140.0528458  95.03212485  69.90574388  2019.917576  66.97732951  24.5616153  18.66113418  25.18993158  2.919940526  9.332679972  5955.055773  177.4543286  179.8275044  721.8279005  1204.5514  32.18040951  50.70149372  71.43881512  52.09486341  335.2403061  1082.916061  16.45287427  70.19931602  4.898513785  17.7428209  16.19097322  0.066145937  0  0.93754895  0.041245888  0.943100816  2.972385775  1.42818705  1.409733753  0.043270226  0.096353099  0.11877625 |

The FPKM value of selected genes from the five tissues.

**Table. S3 Identification of kidney proteins**

Renal cortex Renal medulla

Symbol First Second First Second

| KHK  HK1  G6PC  GLUT2  GLUT1  G6PT1  AKR1B1  TPI1  SORD  ALDOA  FBP1  FBP2  PFKL  PFKM  PFKP  GPI  NKCC2  SGLT1  SGLT2  GP6PC2  CAT  GPX1  GPX3  GSR  SOD1  SOD2  SOD3  IDH1  IDH2  SGLT4  GLUT9  HSP90AA1  HSP90B1  TRAP1  HSPA2  HSPA8  HSPA9  CCT6A  HSPD1  DNAJA3  DNAJB1  DNAJB11  DNAJC6  DNAJC8  DNAJC13  DNAJC19  DNAJC22  CRYAB  HSPB1  HSPB8 | yes  yes  -  yes  -  yes  yes  yes  yes  yes  yes  -  yes  yes  yes  yes  yes  -  yes  -  yes  yes  yes  yes  yes  yes  yes  yes  yes  yes  -  yes  yes  yes  yes  yes  yes  yes  yes  -  -  -  -  -  yes  -  -  yes  -  - | yes  yes  yes  yes  yes  yes  -  yes  yes  yes  yes  yes  yes  yes  yes  yes  yes  -  yes  -  yes  yes  yes  yes  yes  yes  yes  yes  yes  yes  -  yes  yes  yes  yes  yes  yes  yes  yes  yes  yes  -  -  -  yes  yes  -  yes  -  - | yes  yes  -  -  -  -  yes  yes  yes  yes  yes  -  yes  -  -  yes  -  -  -  -  yes  yes  yes  yes  yes  yes  yes  yes  yes  -  -  yes  yes  yes  -  yes  yes  yes  yes  -  -  -  -  yes  -  -  -  yes  -  - | -  yes  -  -  -  yes  yes  yes  -  yes  yes  -  yes  yes  yes  yes  yes  -  -  -  yes  yes  yes  yes  yes  yes  yes  yes  yes  -  -  yes  yes  yes  yes  yes  yes  yes  yes  yes  yes  yes  -  yes  yes  -  -  yes  -  - |
| --- | --- | --- | --- | --- |

Identified proteins in the renal cortex and renal medulla. 'First' represent firstly identified result, 'Second' represent second identified results. 'yes' means the protein was identified in the tissue; '-' means that the protein was not found in the tissue.

**Table. S4 Detection of biochemical indicator from 30 Camel blood and urine**

camel Urine glucose content Serum uric acid Blood glucose content

number (mmol/L) （μmol/L） (mmol/L)

| 1 0 (-) 2 6.7  2 0 (-) 3 6.3  3 0 (-) 4 7.3  4 0 (-) 1 7.8  5 0 (-) 1 5.9  6 0 (-) 4 7.3  7 0 (-) 1 6.9  8 0 (-) 2 6.1  9 0 (-) 4 6.3  10 0 (-) 6 6.3  11 0 (-) 1 6.9  12 0 (-) 1 6.8  13 0 (-) 3 6.4  14 0 (-) 6 7.3  15 0 (-) 5 7.8  16 0 (-) 2 6.6  17 0 (-) 6 7.0  18 0 (-) 3 8.1  19 0 (-) 3 6.7  20 0 (-) 2 5.6  21 0 (-) 2 7.6  22 0 (-) 1 5.9  23 0 (-) 2 6.4  24 0 (-) 3 7.0  25 0 (-) 6 8.0  26 0 (-) 2 7.9  27 0 (-) 4 5.7  28 0 (-) 1 7.3  29 0 (-) 2 5.9  30 0 (-) 5 9.4 |
| --- |

In urine glucose test, '-' represent that no glucose was detected in the urine.

**Table. S5 Differently expressed genes from five tissues**

Symbol Readcount numbers Readcount numbers Log2.Fold Q-value

in liver in renal cortex change

*SOD3* 97.54080652 632.9706894 -2.6981 2.30E-156

*GPX3* 1308.513995 26172.45245 -4.322 0

Symbol Readcount numbers Readcount numbers Log2.Fold Q-value

in muscle in renal cortex change

*SOD3* 9.676103857 667.6112168 -6.1084 9.90E-191

*GPX3* 428.0323706 27604.7898 -6.0111 0

Symbol Readcount numbers Readcount numbers Log2.Fold Q-value

in pancreas in renal cortex change

*SOD3* 67.92281484 509.2528357 -2.9064 2.67E-195

*GPX3* 25.58952559 21056.89229 -9.6845 0

Symbol Readcount numbers Readcount numbers Log2.Fold Q-value

in renal medulla in renal cortex change

*SOD3* 46.41769481 1031.247603 - 4.4736 3.20E-168

*GPX3* 460.3562272 42640.64562 - 6.5333 0

**Table. S5 The expression of *SOD3* and *GPX3* in the renal cortex compared to other four tissues.**

*SOD3* and *GPX3* were highly expressed genes in the renal cortex compared to other four tissues (|log2 (Fold Change)| > 1 and q-value < 0.005).
